# Supplementary material for: Cr(vi) removal by mesoporous FeOOH polymorphs: performance and mechanism
Source: Royal Society of Chemistry journal article supplement (doi:10.1039/c6ra14522a), 2016-01-01
Supplement: c6ra14522a1.pdf [file c6ra14522a1.pdf]

## Supplementary Material

**Table S1**

BET surface area, average pore diameters, and pore volume of the FeOOH polymorphs.

| FeOOH polymorphs | BET area (m <sup>2</sup> /g) | Pore size (nm) | Pore volume (cm <sup>3</sup> /g) |
|------------------|------------------------------|----------------|----------------------------------|
| $\alpha$ -FeOOH  | 147                          | 14             | 0.28                             |
| $\beta$ -FeOOH   | 48                           | 36             | 0.14                             |
| $\gamma$ -FeOOH  | 294                          | 3              | 0.22                             |
| $\delta$ -FeOOH  | 187                          | 9              | 0.41                             |

**Table S2**

The final pH values and Cr(VI) removal efficiencies by the four FeOOH polymorphs.

| pH <sub>0</sub> | $\alpha$ -FeOOH |                    | $\beta$ -FeOOH  |                    | $\gamma$ -FeOOH |                    | $\delta$ -FeOOH |                    |
|-----------------|-----------------|--------------------|-----------------|--------------------|-----------------|--------------------|-----------------|--------------------|
|                 | pH <sub>s</sub> | Removal efficiency |
| 3.0             | 2.9             | 85.5%              | 2.7             | 35.4%              | 5.3             | 100.0%             | 6.9             | 84.6%              |
| 5.0             | 3.4             | 89.4%              | 2.8             | 25.9%              | 6.9             | 74.4%              | 8.0             | 28.7%              |
| 7.0             | 3.6             | 90.3%              | 2.9             | 47.1%              | 7.5             | 51.8%              | 8.3             | 20.6%              |
| 9.0             | 3.7             | 94.5%              | 3.0             | 52.0%              | 7.8             | 43.7%              | 8.6             | 19.4%              |

pH<sub>0</sub>: The initial pH value; pH<sub>s</sub>: The final pH value after reaction for 120 min;

Removal efficiency: The Cr(VI) removal efficiency after reaction for 120 min.

**Table S3**

The Langmuir, Freundlich and Redlich–Peterson isotherm parameters for Cr(VI) adsorption on FeOOH polymorphs.

| Adsorbent       | Langmuir        |                 |       | Freundlich      |       |       | Redlich-Peterson |               |       |       |
|-----------------|-----------------|-----------------|-------|-----------------|-------|-------|------------------|---------------|-------|-------|
|                 | $q_m$<br>(mg/g) | $K_L$<br>(L/mg) | $R^2$ | $K_F$<br>(mg/g) | $n$   | $R^2$ | $a$<br>(L/mg)    | $b$<br>(L/mg) | $m$   | $R^2$ |
| $\alpha$ -FeOOH | 24.272          | 0.181           | 0.885 | 8.139           | 4.583 | 0.994 | 8.714            | 0.700         | 0.864 | 0.991 |
| $\beta$ -FeOOH  | 16.644          | 0.884           | 0.809 | 9.456           | 9.093 | 0.909 | 9.800            | 0.713         | 0.958 | 0.903 |
| $\gamma$ -FeOOH | 32.357          | 0.075           | 0.818 | 12.316          | 5.765 | 0.996 | 7.858            | 0.526         | 0.857 | 0.951 |
| $\delta$ -FeOOH | 34.452          | 0.010           | 0.991 | 1.581           | 1.970 | 0.982 | 0.389            | 0.020         | 0.905 | 0.995 |
